# Supplementary material for: Polymorphism analysis of propeller domain of k13 gene in Plasmodium ovale curtisi and Plasmodium ovale wallikeri isolates original infection from Myanmar and Africa in Yunnan Province, China
Source: PubMed Central journal article supplement (PMC7359257; doi:10.1186/s12936-020-03317-2), 2020-07-13
Supplement: 12936_2020_3317_MOESM1_ESM.pdf [file 12936_2020_3317_MOESM1_ESM.pdf]

## Supplement 1

### Malaria case confirmation by Yunnan Provincial Reference Laboratory

All the confirmed *P. ovale* cases in Yunnan Province have been misidentified as *P. vivax* by the routine morphological examination performed at the county-level laboratories. The morphological and genetic data for case confirmation at YNRL of 15 malaria cases were as follows.

### Morphological examination results

#### 1. rld01m (*P. ovale*, thin blood smear, $\times 1000$ )

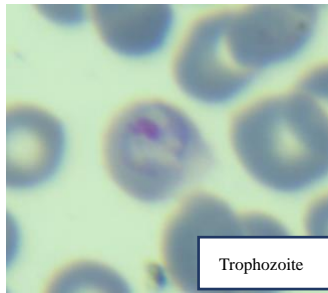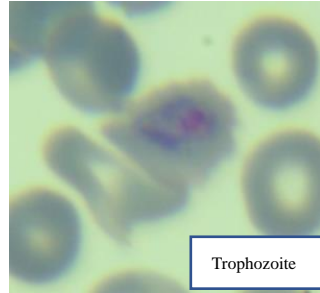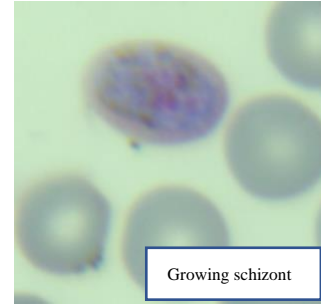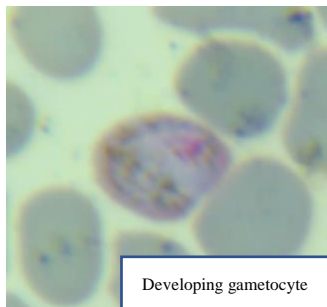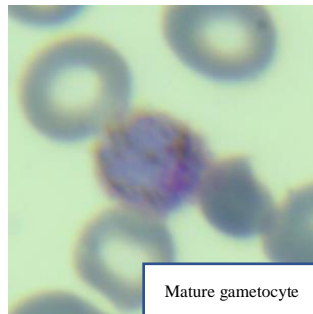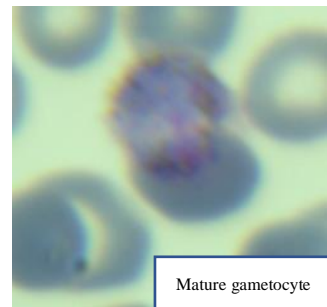

#### 2. tcb02m (*P. ovale*, thin blood smear, $\times 1000$ )

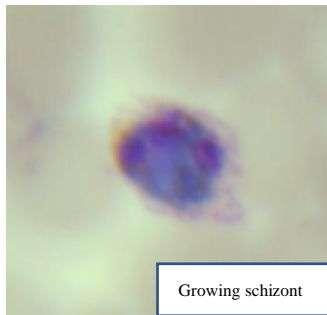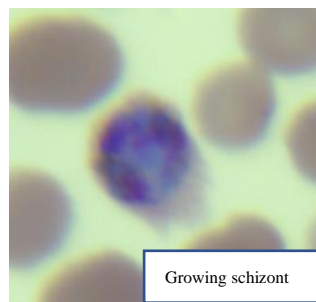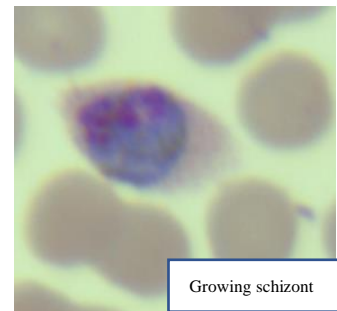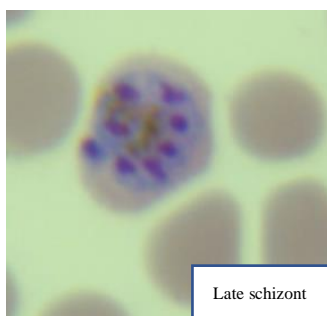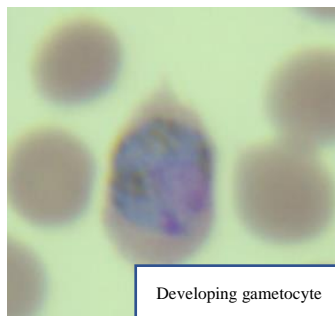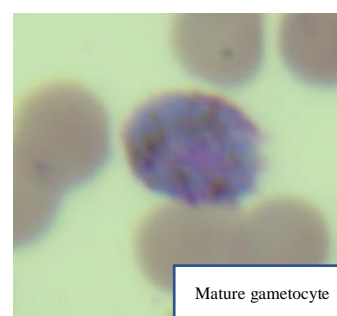

**3. lcd03m (*P. ovale*, thin blood smear, ×1000)**

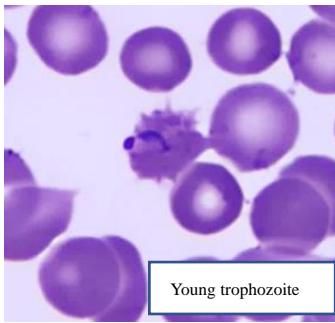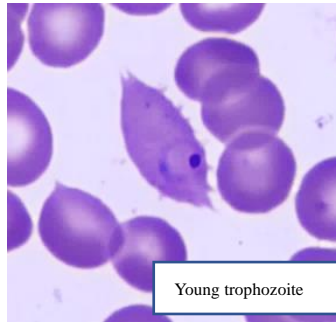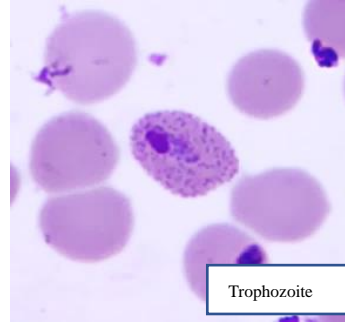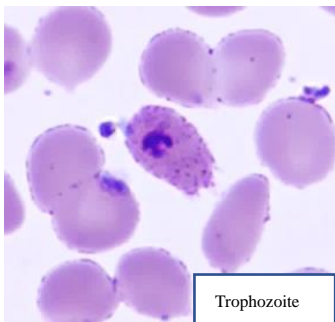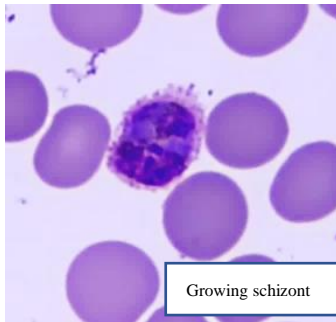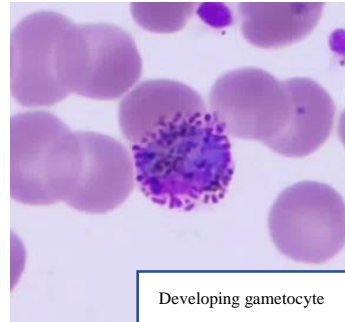

**4. Itcb04m (*P. ovale*, thin blood smear, ×1000)**

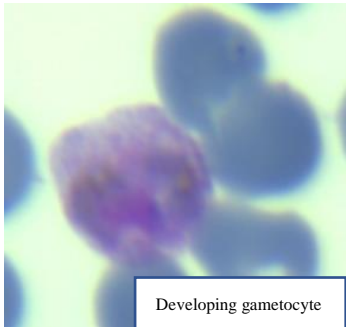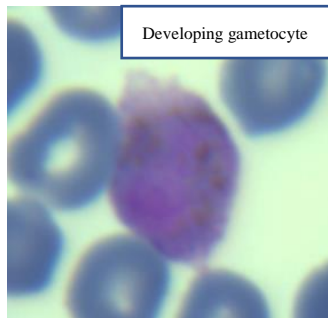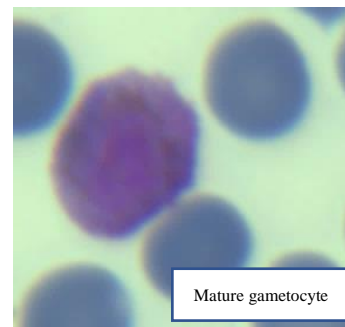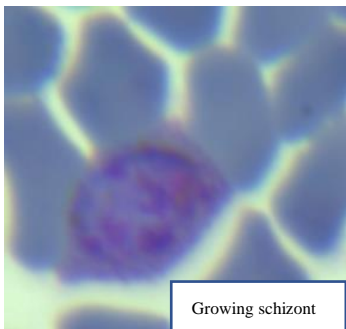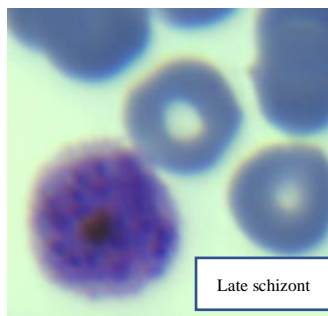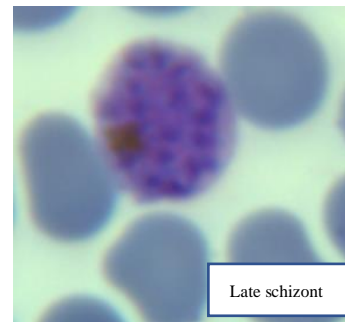

5. gdk05m (*P. ovale*, thin blood smear, ×1000)

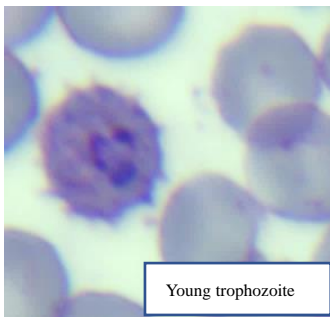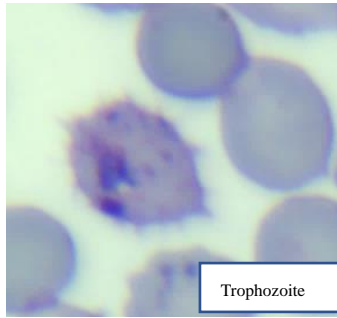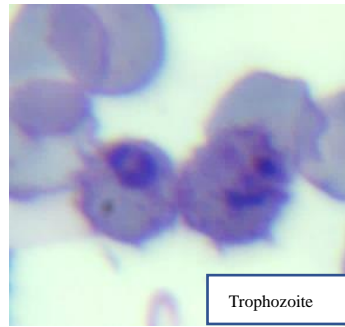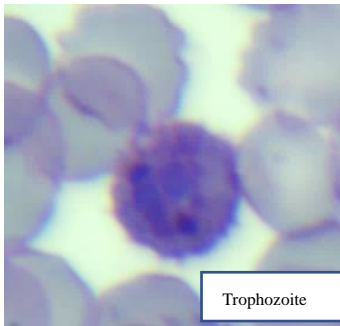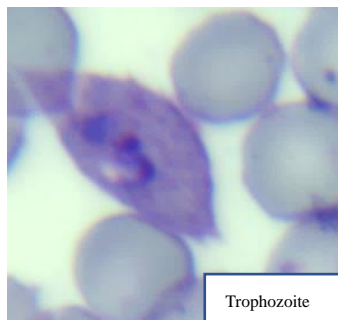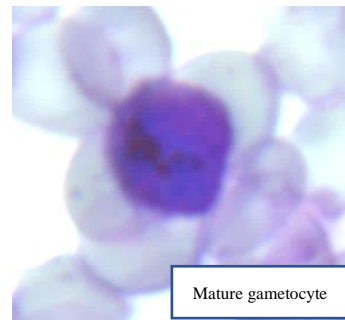

6. kgk06a (*P. ovale*, thin blood smear, ×1000)

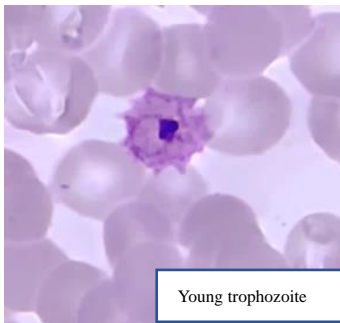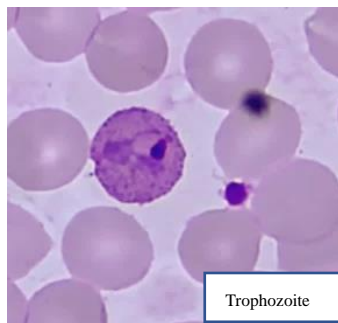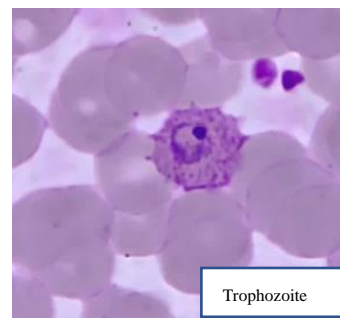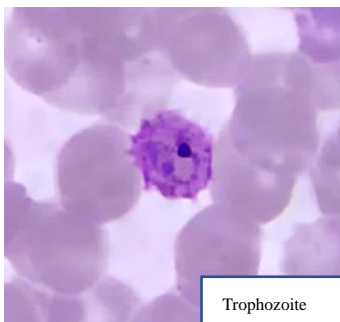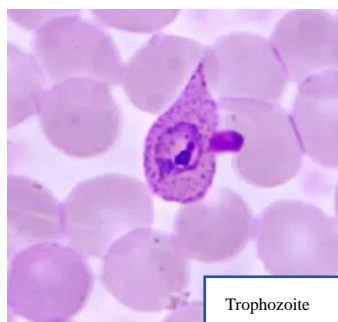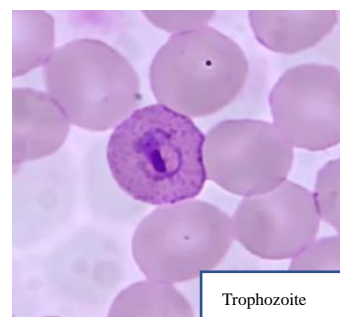

7. gsk07a (*P. ovale*, thin blood smear, ×1000)

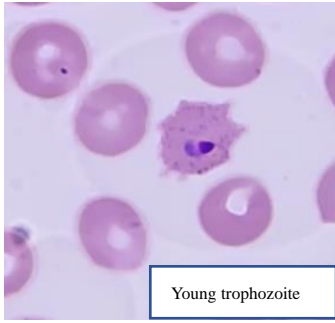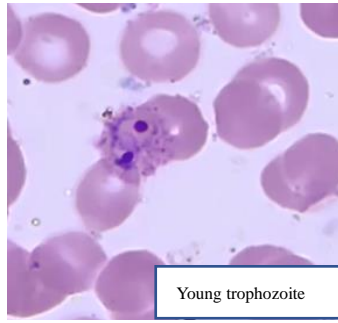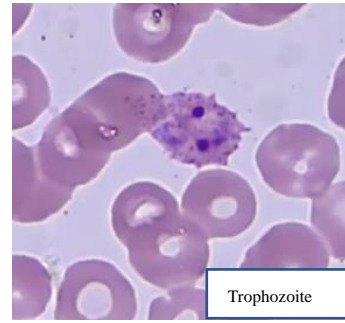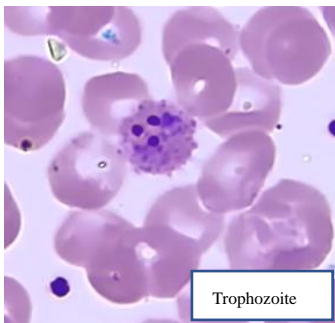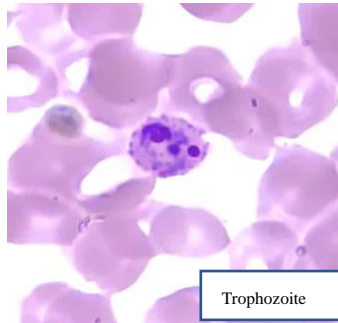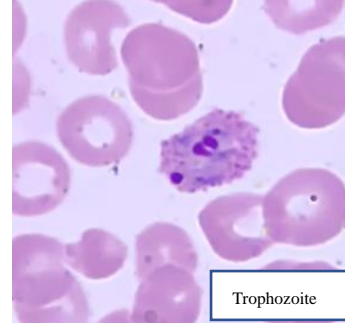

8. dld08a (*P. ovale*, thin blood smear, ×1000)

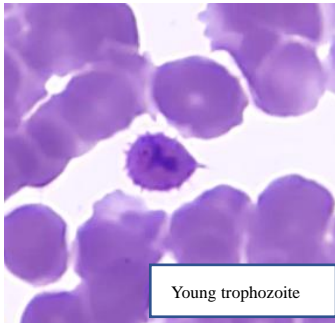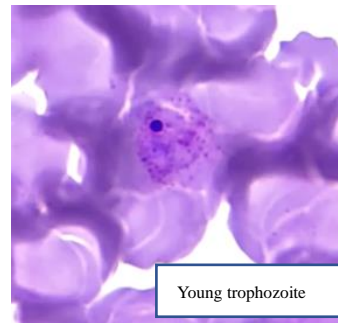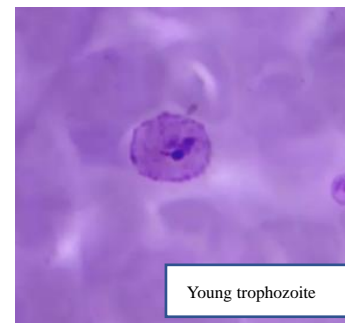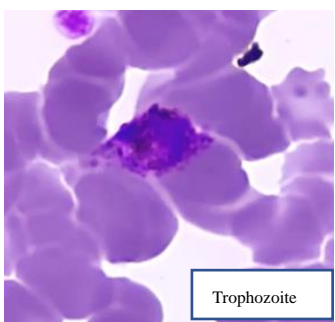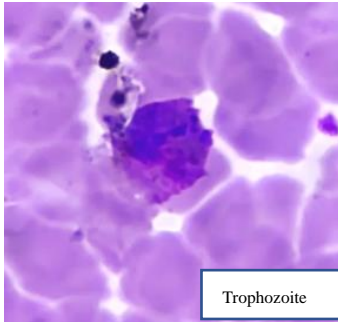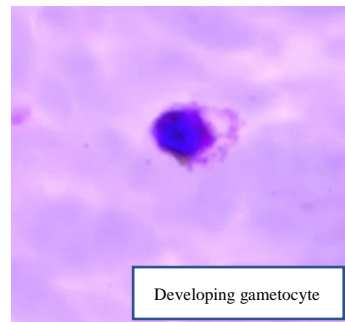

**9. jsh09a (*P. ovale*, thin blood smear, ×1000)**

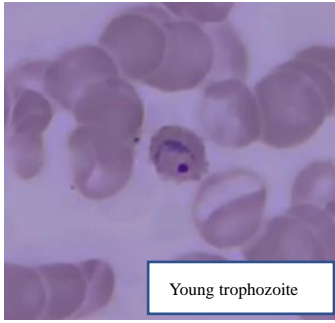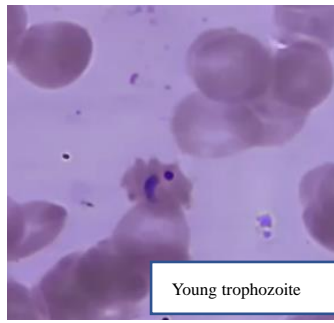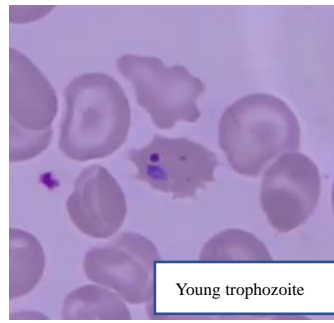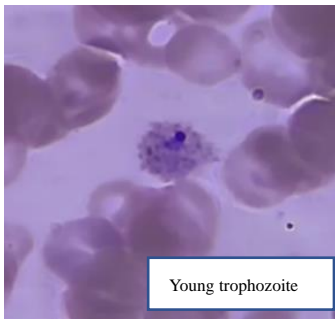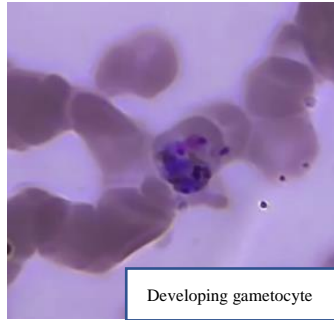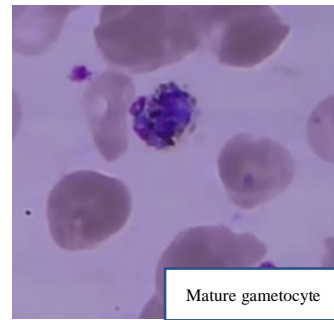

**10. ztz10a (*P. ovale*, thin blood smear, ×1000)**

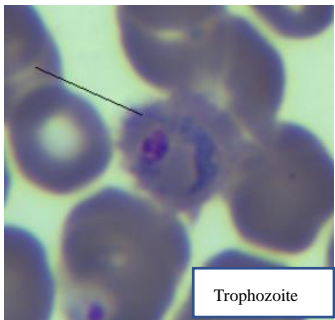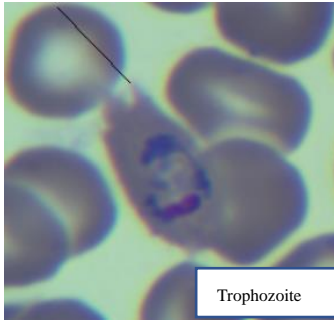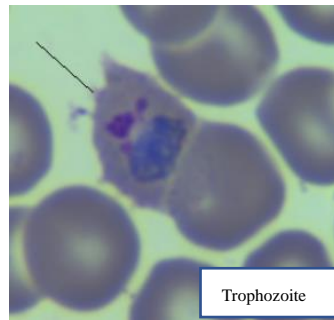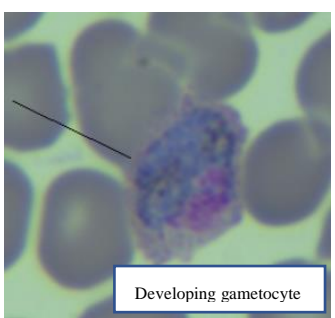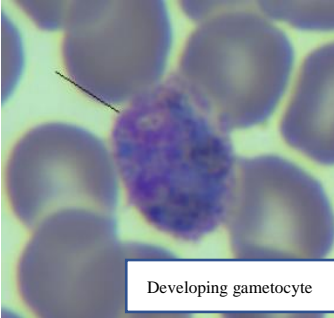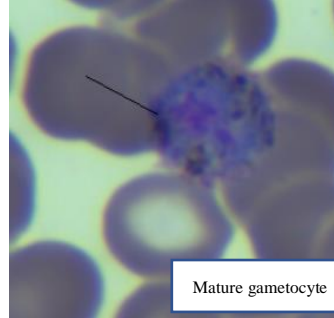

11. Idz11a (*P. ovale*, thin blood smear, ×1000)

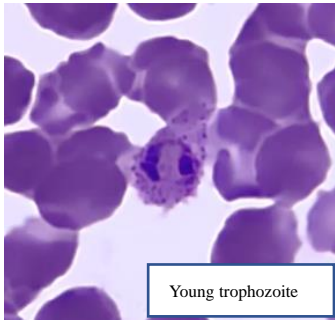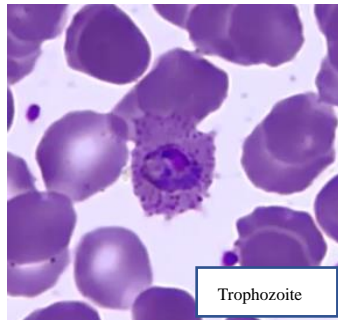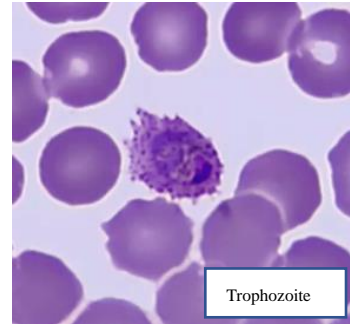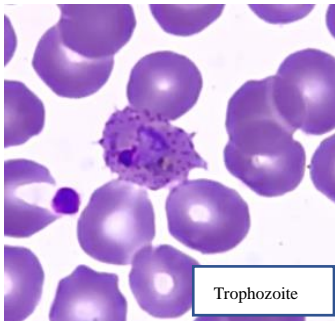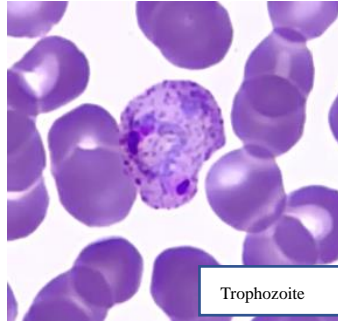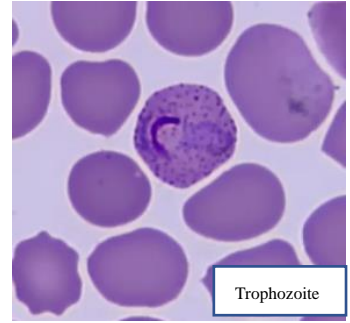

12. esy12a (*P. ovale*, thin blood smear, ×1000)

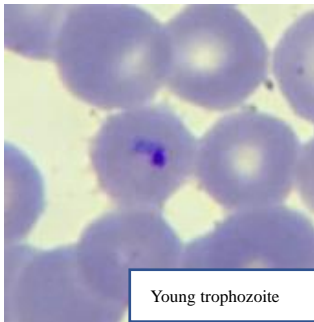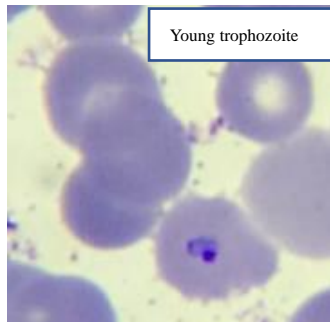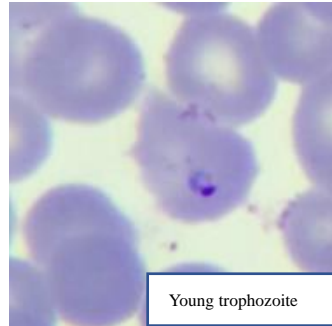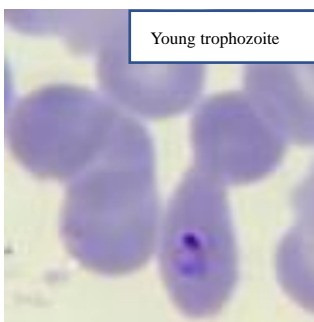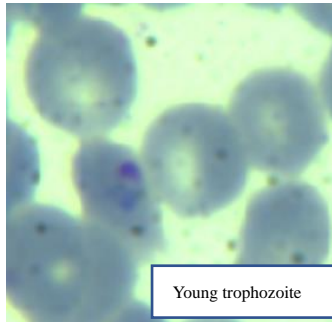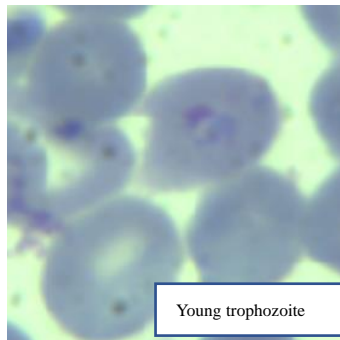

13. jcy13a (*P. ovale*, thin blood smear, ×1000)

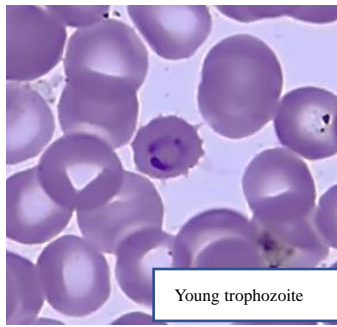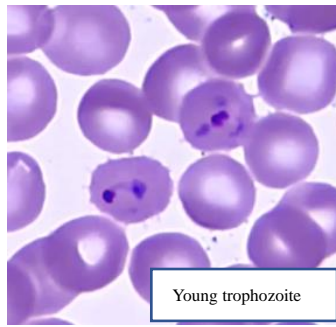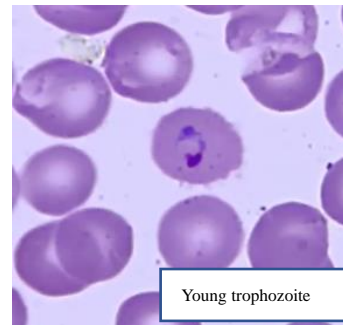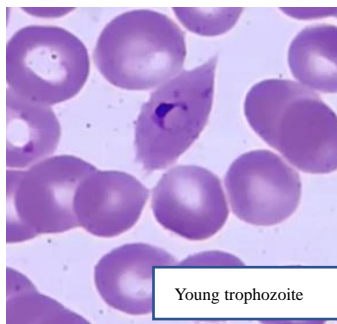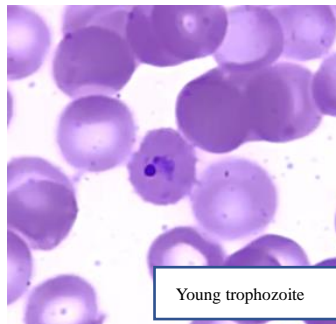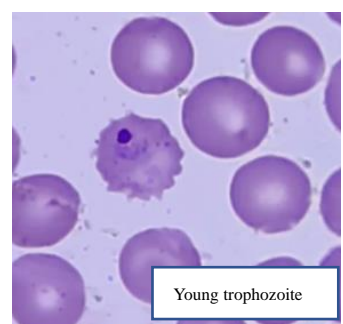

14. dld15a (*P. ovale*, thin blood smear, ×1000)

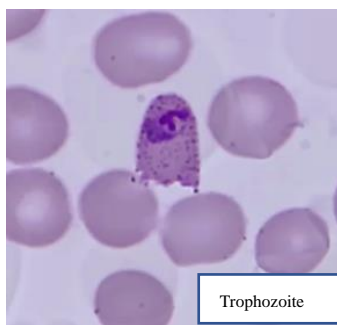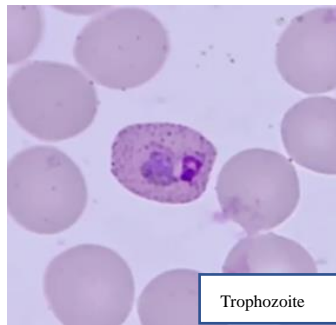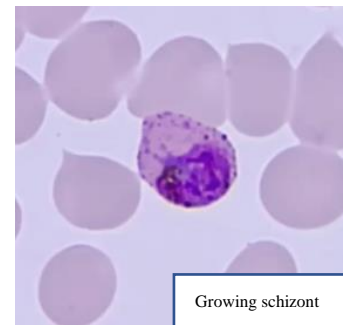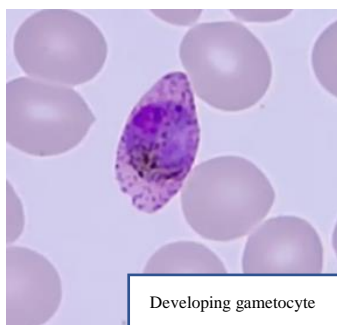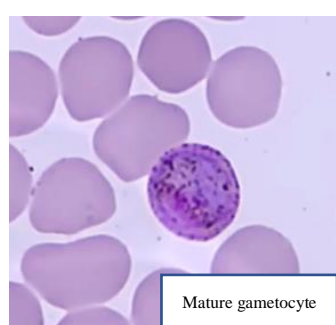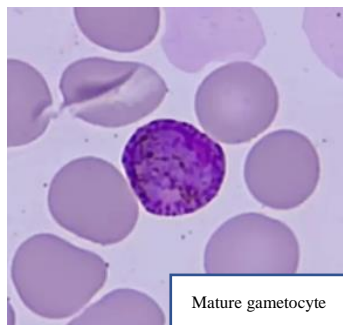

**15. xwq17a (*P. ovale*, thin blood smear, ×1000)**

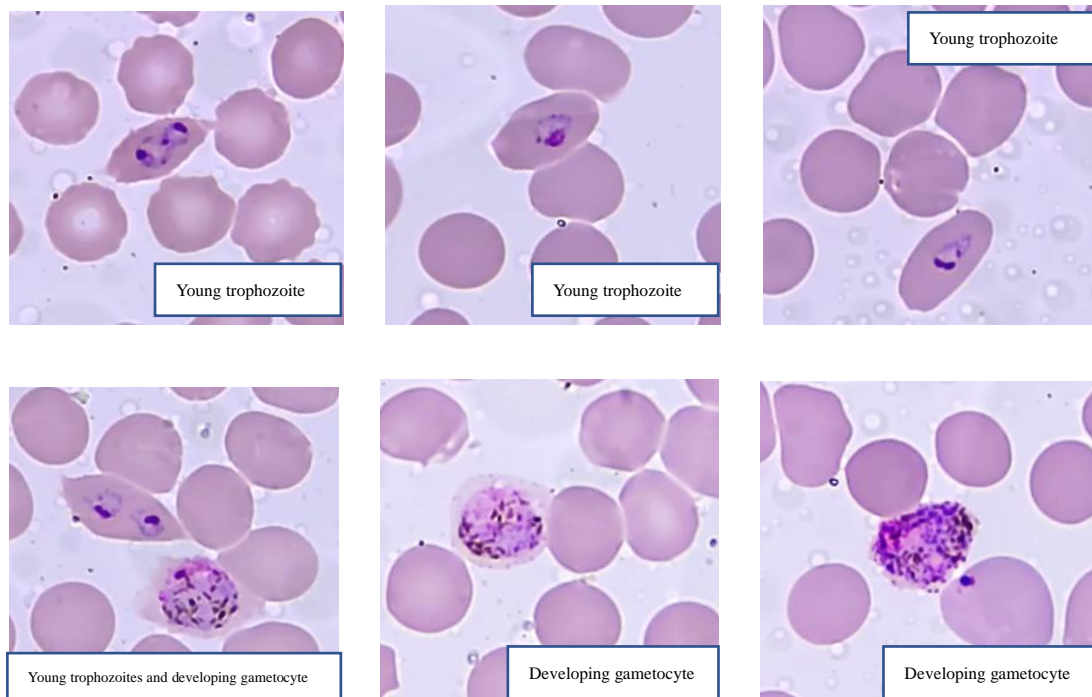

**PCR results**

The target gene was 18S (small subunit) ribosomal RNA gene (18S *rRNA*). The upstream, downstream primers of first-round and second-round PCR reaction were 5'-CCTGTTGTTGCCTTAAACTTC-3' and 5'-TTAAAATTGTTGCAGTTAAAACG-3', 5'-ATCTCTTTTGCTATTTTTAGTATTGGAGA-3' and 5'-GGAAAGGACACATTAATTGTATCCTAGTG-3', respectively. The expected DNA fragments of the amplified product in second-round PCR was 800 bp.

The following electropherogram showed that the amplifications of *P. ovale* 18S rRNA gene in the 15 isolates (rld01m, tcb02m, lcd03m, tcb04m, gdk05m, k9k06a, gsk07a, dld08a, jsh09a, jzt10a, ldz11a, esy12a, joy13a, dld15a, xwq17a) was positive.

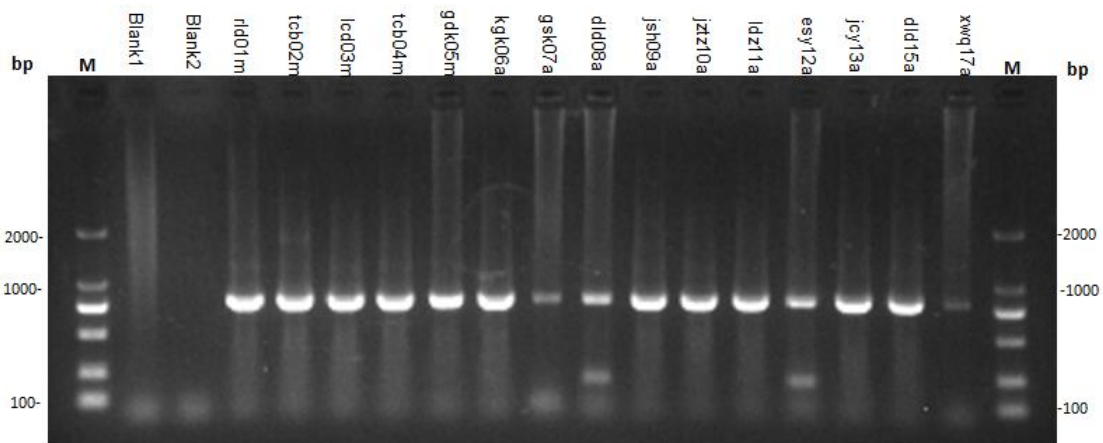



**Species further confirmed by Yunnan Provincial Reference Laboratory (Table 1)**

**Table 1** The records of case confirmation for 15 *ovale* malaria cases

| Samples | Infection source <sup>a</sup> | Initial diagnosis |                   | Further diagnosis <sup>b</sup>    |                            |                              |
|---------|-------------------------------|-------------------|-------------------|-----------------------------------|----------------------------|------------------------------|
|         |                               | Species           | County-level Lab. | Species by microscope examination | Parasitemia (parasites/μl) | Species by genetic detection |
| rld01m  | Myanmar                       | <i>P. vivax</i>   | Ruili             | <i>P. ovale</i>                   | 77                         | <i>P. ovale</i>              |
| tcb02m  | Myanmar                       | <i>P. vivax</i>   | Tengchong         | <i>P. ovale</i>                   | 44730                      | <i>P. ovale</i>              |
| lcd03m  | Myanmar                       | <i>P. vivax</i>   | Longchuan         | <i>P. ovale</i>                   | 475                        | <i>P. ovale</i>              |
| tcb04m  | Myanmar                       | <i>P. vivax</i>   | Tengchong         | <i>P. ovale</i>                   | 96                         | <i>P. ovale</i>              |
| gdk05m  | Myanmar                       | <i>P. vivax</i>   | Guandu            | <i>P. ovale</i>                   | 16898                      | <i>P. ovale</i>              |
| kgk06a  | Congo                         | <i>P. vivax</i>   | Guandu            | <i>P. ovale</i>                   | 10082                      | <i>P. ovale</i>              |
| gsk07a  | Gabon                         | <i>P. vivax</i>   | Guandu            | <i>P. ovale</i>                   | 6322                       | <i>P. ovale</i>              |
| dld08a  | Congo                         | <i>P. vivax</i>   | Dali              | <i>P. ovale</i>                   | 14717                      | <i>P. ovale</i>              |
| jsh09a  | Guinea                        | <i>P. vivax</i>   | Jianshui          | <i>P. ovale</i>                   | 38                         | <i>P. ovale</i>              |
| ztz10a  | Nigeria                       | <i>P. vivax</i>   | Zhaotong          | <i>P. ovale</i>                   | 8898                       | <i>P. ovale</i>              |
| ldz11a  | Cameroon                      | <i>P. vivax</i>   | Ludian            | <i>P. ovale</i>                   | 4508                       | <i>P. ovale</i>              |
| esy12a  | Uganda                        | <i>P. vivax</i>   | Eshan             | <i>P. ovale</i>                   | 40858                      | <i>P. ovale</i>              |
| jcyl3a  | Ghana                         | <i>P. vivax</i>   | Jiangchuan        | <i>P. ovale</i>                   | 1221                       | <i>P. ovale</i>              |
| dld15a  | Cameroon                      | <i>P. vivax</i>   | Dali              | <i>P. ovale</i>                   | 8704                       | <i>P. ovale</i>              |
| xwq17a  | Guinea                        | <i>P. vivax</i>   | Xuanwei           | <i>P. ovale</i>                   | 26258                      | <i>P. ovale</i>              |

<sup>a</sup>: Infection source identified by epidemiological investigation; <sup>b</sup>: Case confirmation by Yunnan Provincial Reference Laboratory (YNRL).
